# Supplementary material
Source: MDPI journal article supplement (https://www.mdpi.com/2071-1050/12/10/4113)

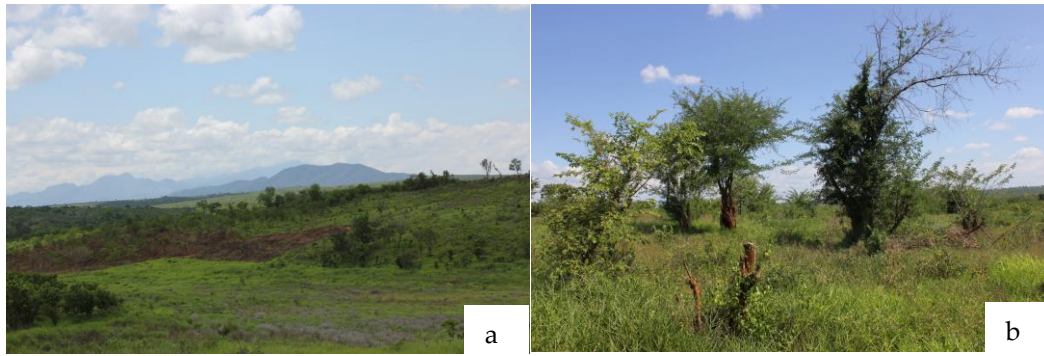

Figure S1. a. Agricultural land and b, The forest reserve of miombo woodland.

Supplement: s1 [file s1]
